# Supplementary material for: Diethyldithiocarbamate (DDTC) induced formation of positively charged silver nanoparticles for rapid in situ identification of inorganic explosives by surface enhanced Raman spectroscopy
Source: Royal Society of Chemistry journal article supplement (doi:10.1039/c6ra06111g), 2016-01-01
Supplement: c6ra06111g1.pdf [file c6ra06111g1.pdf]

**Supplementary Information for**  
**Diethyldithiocarbamate (DDTC) induced formation of positively charged silver nanoparticles for rapid in-situ identification of inorganic explosives by surface enhanced Raman spectroscopy**

Juan Chen, Yu-e Shi, Min Zhang, Jinhua Zhan\*

National Engineering Research Center for Colloidal Materials and Key Laboratory for Colloid and Interface Chemistry of Ministry of Education, Department of Chemistry, Shandong University,  
Jinan 250100, China.

\* Corresponding author: [jhzhan@sdu.edu.cn](mailto:jhzhan@sdu.edu.cn)

1. The EDS of the DDTC modified silver colloid and the XPS spectra of the S (2p) scan of silver colloid after modification with DDTC.
2. Experimental Raman peaks for DDTC powder and SERS peaks for DDTC modified silver nanoparticles.
3. Structures of DDTC before and after modification.
4. Chemical structures of three explosives characteristic anions.
5. The pH effect of DDTC modification.
6. SEM image of the silver colloid.
7. The discrepancy of aggregated and nonaggregated DDTC modified silver nanoparticles.
8. Investigation of the volume of DDTC in the modification process.
9. SERS spectra of explosives anions extracted on the DDTC modified Ag/Cu fiber compared with the Raman spectra of the explosives anions powder.
10. The explosives anions detection before and after modification of DDTC.
11. The uniformity of DDTC-modified silver colloid before and after normalization.
12. Reproducibility study.
13. The study of ageing time of the DDTC modified silver nanoparticles.
14. The calculated EFs of three explosives characteristic anions.
15. Preparation and Raman characterization of DDTC induced the positively charged gold

nanoparticles.

16. The analytical performance of various methods for inorganic explosives determination.

1. The EDS of the DDTC modified silver colloid and the XPS spectrum of the S (2p) scan of silver colloid after modification with DDTC.

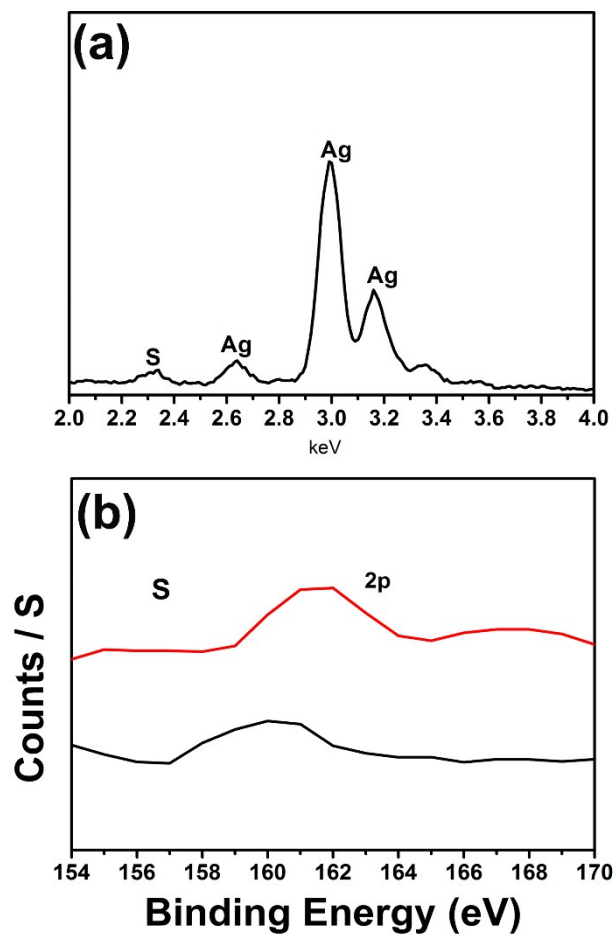

Figure S1. (a) EDS of the DDTC modified silver colloid. (b) XPS spectra of the S (2p) scan of the silver colloid before (red) and after (black) modification with DDTC.

2. Experimental Raman peaks for DDTC powder and SERS peaks for DDTC modified silver nanoparticles.

**Table S1 SERS and Normal-Raman bands of DDTC with their assignments<sup>1-3</sup>. Wavenumbers in cm<sup>-1</sup>.**

| SERS (cm <sup>-1</sup> ) | Normal-Raman (cm <sup>-1</sup> ) | Approximate assignment                                 |
|--------------------------|----------------------------------|--------------------------------------------------------|
| -                        | 310                              | N-C=S in plane bending                                 |
| -                        | 423                              | S=C-S stretch                                          |
| 564                      | 568                              | NCS <sub>2</sub> out of plane wagging                  |
| 776                      | 775                              | CCNC stretch                                           |
| -                        | 835                              | CH <sub>3</sub> rock; CH <sub>2</sub> rock             |
| 894                      | 914                              | CH <sub>3</sub> rock; CH <sub>2</sub> rock             |
| 1003                     | 1006                             | CH symmetrical twist                                   |
| 1074                     | 1074                             | CS <sub>2</sub> antisymmetric stretch                  |
| 1145                     | 1135                             | CH <sub>3</sub> rock; CH <sub>2</sub> rock             |
| 1273                     | 1267                             | CH anti-symmetrical clipping                           |
| 1374                     | 1370                             | CH symmetrical wagging                                 |
| 1423                     | 1417                             | CH symmetrical clipping                                |
| 1497                     | -                                | $\nu$ (C=N) and $\delta$ (HCH)(CH <sub>2</sub> ) sciss |

3. Structures of DDTC before and after modification.

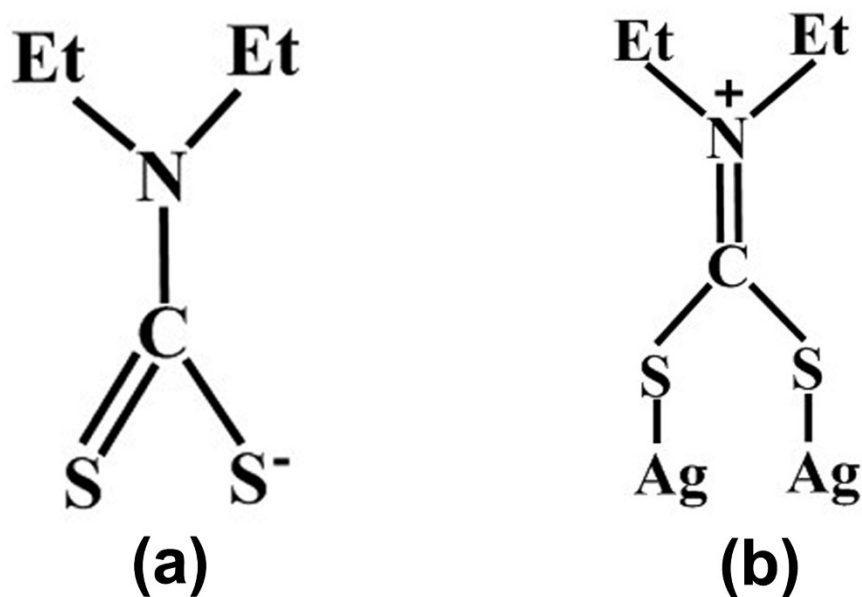

Figure S2. Structures of DDTC before and after modified on the silver nanoparticles.

4. Chemical structures of three explosives characteristic anions.

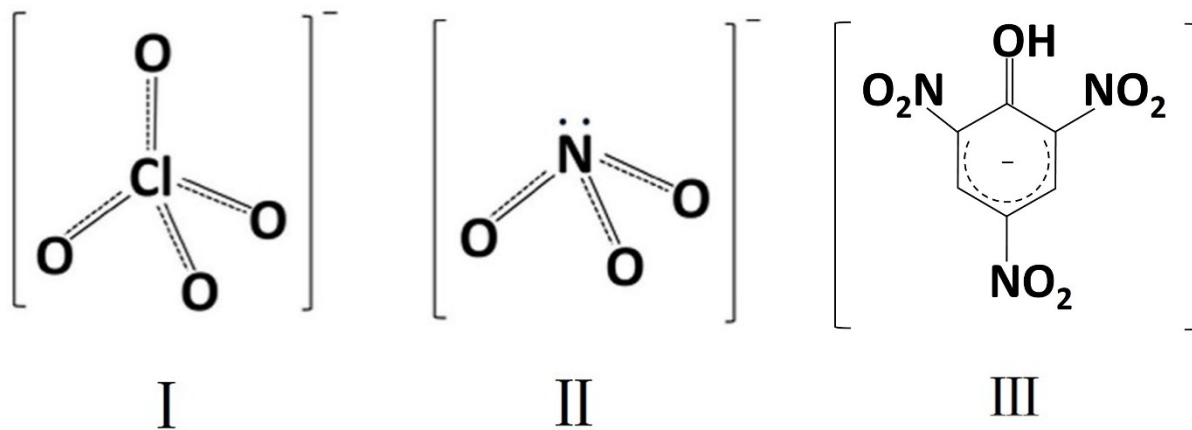

Figure S3. Chemical structures of ( I ) perchlorate (ClO<sub>4</sub><sup>-</sup>), ( II ) nitrate (NO<sub>3</sub><sup>-</sup>) and ( III ) picric acid

(PA)

5. The pH effect of DDTC modification.

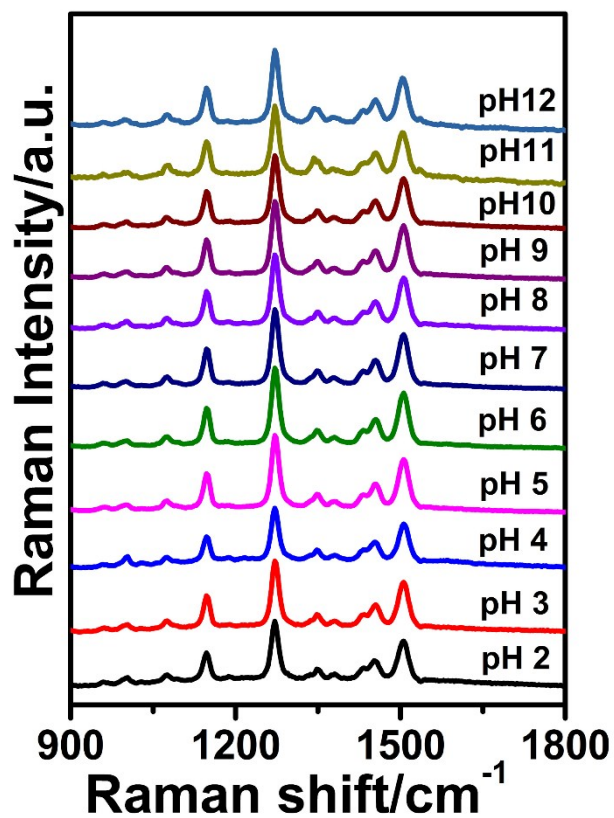

Figure S4 Raw Raman spectra of DDTC-silver colloid at varying pH values. The pH was adjusted using HCl or NaOH.

6. SEM image of the silver colloid.

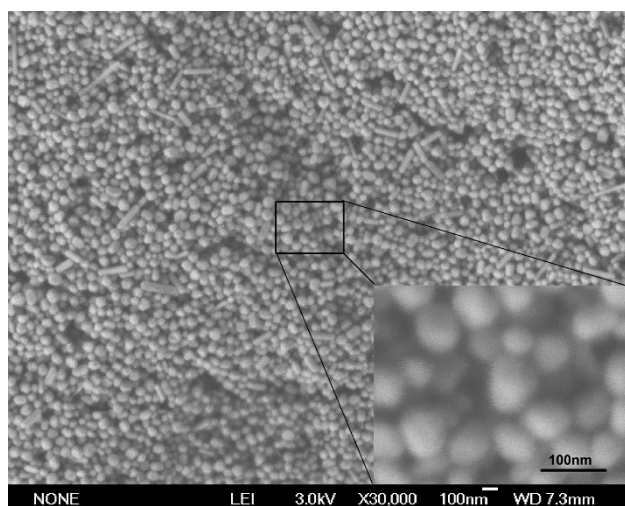

Figure S5. SEM image of the evaporated DDTC-modified silver colloid.

7. The discrepancy of aggregated and non-aggregated DDTC modified silver nanoparticles.

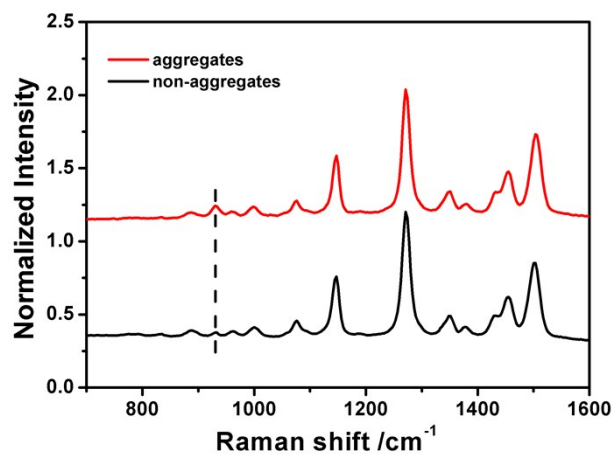

Figure S6. SERS spectra of 0.1 mM perchlorate with aggregated DDTC modified silver nanoparticles (red) and non-aggregated DDTC modified silver nanoparticles (black).

8. Investigation of the volume of DDTC in the modification process.

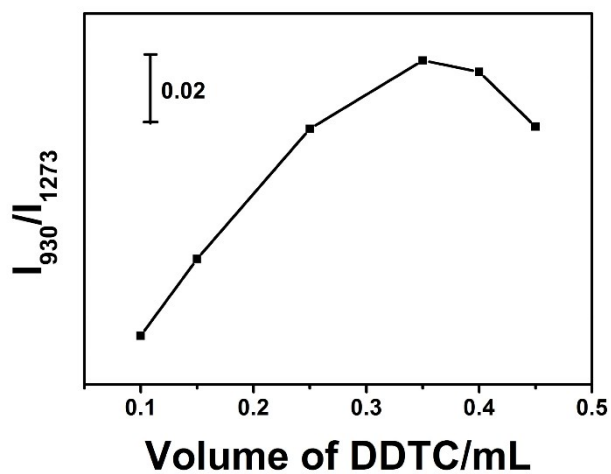

Figure S7. Plot of normalized intensity of perchlorate at 930 cm⁻¹ with the various volume of DDTC modified silver colloid. The volume of DDTC is 0.10mL, 0.15 mL, 0.25 mL, 0.35 mL, 0.4 mL, 0.45 mL respectively.

9. SERS spectra of explosives anions extracted on the DDTC modified Ag nanoparticles compared with the Raman spectra of the explosives anions powder.

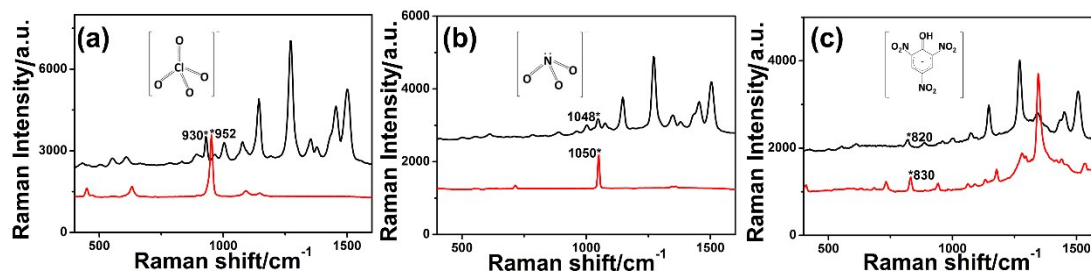

Figure S8. SERS spectra of detection of perchlorate (a), nitrate (b) and PA (c) (black) and the Raman spectra of perchlorate (a), nitrate (b) and PA (c) powder (red) for comparison.

10. The explosives anions detection before and after modification of DDTC.

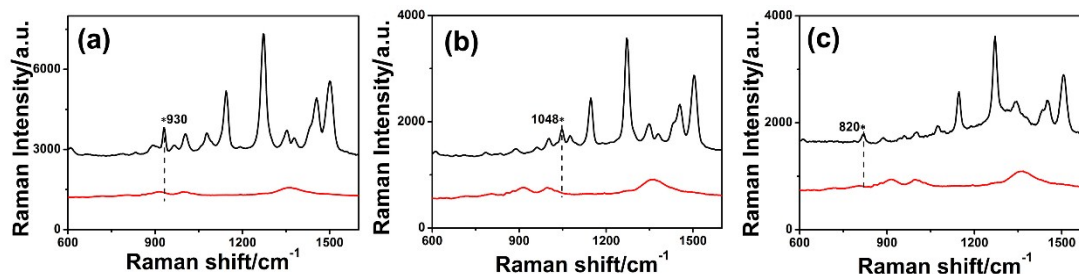

Figure S9. SERS spectra of detection of perchlorate (a), nitrate (b) and PA (c) after (black) and before (red) the modification of DDTC on the silver colloid.

11. The uniformity of DDTC-modified silver colloid before and after normalization.

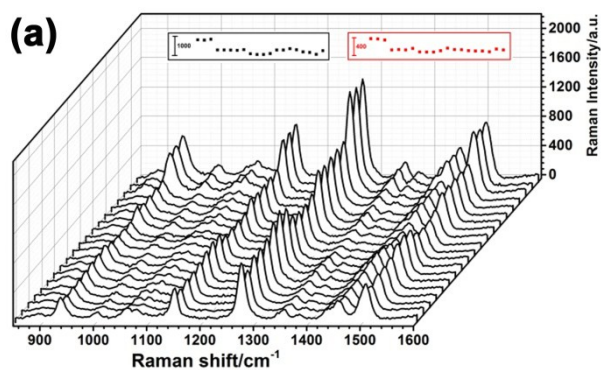

Figure. S10a. The uniformity before normalization of DDTC-modified silver colloid on the tin foil probed with 1 mM perchlorate, Inset represented the Raman intensity change of Raman band of perchlorate at  $930\text{ cm}^{-1}$  (red) with an RSD of 11.4% and the Raman intensity change of Raman band of DDTC at  $1273\text{ cm}^{-1}$  (black) with an RSD of 14.4%.



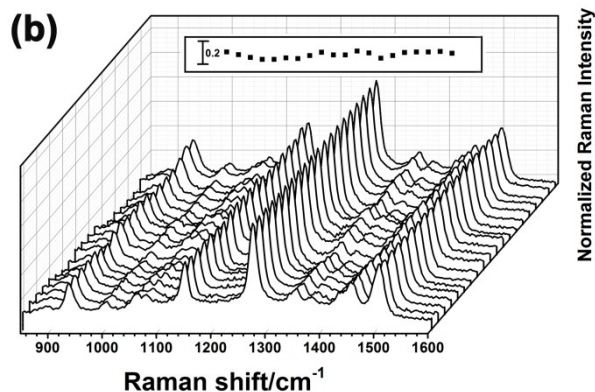

Figure. S10b. The uniformity after normalization of DDTC-modified silver colloid on the tin foil probed with 1 mM perchlorate. The SERS spectra were normalized using the Raman peak of DDTC at  $1273\text{ cm}^{-1}$  as the reference. Inset shows the changes of the Raman band of perchlorate at  $930\text{ cm}^{-1}$  with an RSD of 5.45%.

12. Reproducibility study.

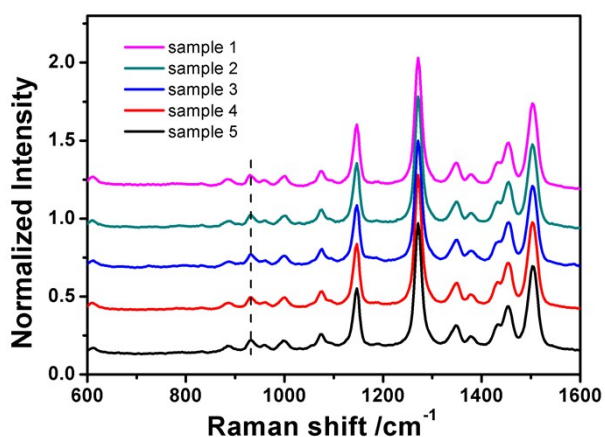

Figure .S11 SERS spectra of five sample of 0.1 mM perchlorate.

13. The study of ageing time of the DDTC modified silver nanoparticles.

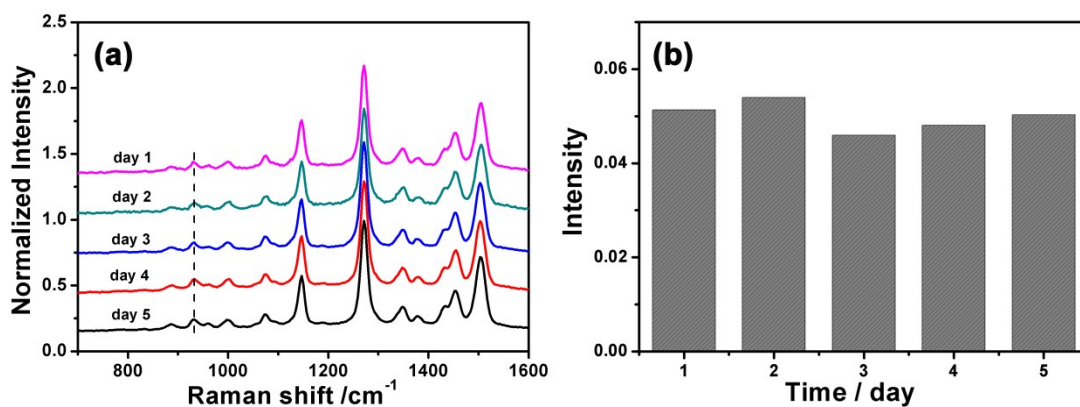

Figure. S12 (a)SERS spectra of 0.1 mM perchlorate with DDTC modified silver colloid of storage time; (b) the normalized Intensity at  $930\text{ cm}^{-1}$  over 5 days.

14. The calculated EFs of three explosives characteristic anions.

**Table S2 EF (Enhancement factor) of anions**

|    | perchlorate       | nitrate           | picric acid       |
|----|-------------------|-------------------|-------------------|
| EF | $2.5 \times 10^4$ | $2.3 \times 10^4$ | $2.1 \times 10^4$ |

The enhancement factor (EF) also calculated using the formula:<sup>4</sup>

$$EF = (I_{SERS}/I_{Raman}) \cdot (N_{bulk}/N_{ads})$$

where  $I_{SERS}$  is the intensity of surface enhanced signal (at lower concentration),  $N_{ads}$  is the number of explosives anions under laser radiation adsorbed on substrate,  $I_{Raman}$  is the intensity of normal Raman signal of explosives anion powders, and  $N_{bulk}$  is the number of explosives anions in the scattering volume in bulk solution.

15. Preparation and Raman characterization of DDTC induced the positively charged gold nanoparticles.

Citrate stabilized Au NPs were prepared according to the kinetically controlled seeded growth method.<sup>5</sup> The positively charged gold colloid was obtained by modifying with DDTC similar to the silver colloid.

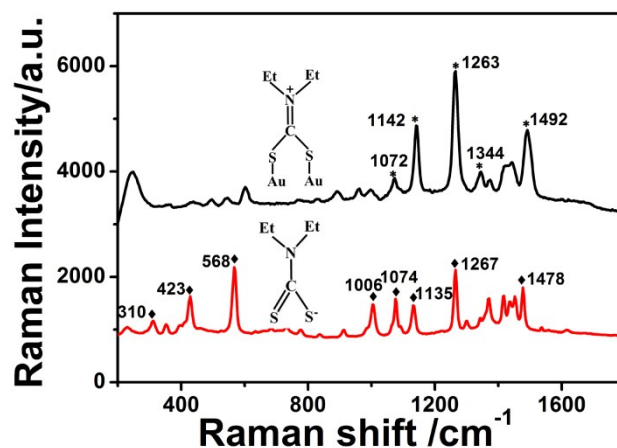

Figure. S13 Raman spectra of DDTC powder (red) and DDTC modified on the gold colloid (black).

16. The analytical performance of various methods for inorganic explosives determination.

**Table S3.** Comparison of the analytical performance of various methods for inorganic explosives determination

|                               | IC <sup>6</sup> | CE <sup>7</sup> | IMS <sup>8</sup> | Our method              |
|-------------------------------|-----------------|-----------------|------------------|-------------------------|
| ClO <sub>4</sub> <sup>-</sup> | 8.4 ppb         | 0.90 mg/L       | 6.30 ng          | 1.19 ng/cm <sup>2</sup> |
| NO <sub>3</sub> <sup>-</sup>  | 5.4 ppb         | 0.57 mg/L       | 0.10 ng          | 2.01 ng/cm <sup>2</sup> |

LOD was determined as three times the standard deviation above the blank.

y=three times the standard deviation above the blank.

x= limit of detection (LOD).

| Anions         | perchlorate                                    | nitrate                                        | picric acid                                    |
|----------------|------------------------------------------------|------------------------------------------------|------------------------------------------------|
| Liner equation | $y=4.73 \times 10^{-3} + 1.84 \times 10^{-4}x$ | $y=4.44 \times 10^{-3} + 2.73 \times 10^{-4}x$ | $y=3.00 \times 10^{-3} + 2.34 \times 10^{-4}x$ |
| Standard       | 0.00165                                        | 0.0017                                         | 0.0017                                         |
| LOD ( ng•cm-2) | 1.19                                           | 2.01                                           | 8.96                                           |

**Reference:**

1. C. T. Soto, A. Costa, O. Versiane, T. Lemma, N. Machado, M. Mondragón and A. Martin, *Spectrochimica Acta Part A: Molecular and Biomolecular Spectroscopy*, 2015, **146**, 192-203.
2. C. T. Soto, A. Costa, J. Ramos, L. Vieira, N. Rost, O. Versiane, J. Rangel, M. Mondragón, L. Raniero and A. Martin, *Spectrochimica Acta Part A: Molecular and Biomolecular Spectroscopy*, 2013, **116**, 546-555.
3. Q. Liao, Z. Yue, D. Yang, Z. Wang, Z. Li, H. Ge and Y. Li, *Corros Sci*, 2011, **53**, 1999-2005.
4. S. Hamad, G. K. Podagatlapalli, M. A. Mohiddon and V. R. Soma, *Appl Phys Lett*, 2014, **104**, 263104.
5. X. Ji, X. Song, J. Li, Y. Bai, W. Yang and X. Peng, *J Am Chem Soc*, 2007, **129**, 13939-13948.
6. C. Johns, R. A. Shellie, O. G. Potter, J. W. O'Reilly, J. P. Hutchinson, R. M. Guijt, M. C. Breadmore, E. F. Hilder, G. W. Dicoski and P. R. Haddad, *J Chromatogr A*, 2008, **1182**, 205-214.
7. J. P. Hutchinson, C. J. Evenhuis, C. Johns, A. A. Kazarian, M. C. Breadmore, M. Macka, E. F. Hilder, R. M. Guijt, G. W. Dicoski and P. R. Haddad, *Anal Chem*, 2007, **79**, 7005-7013.
8. L. Peng, L. Hua, W. Wang, Q. Zhou and H. Li, *Sci. Rep.*, 2014, **4**, 6631.
